# Supplementary material
Source: publisher figshare collection journal article supplement (https://acs.figshare.com/ndownloader/files/4212739)
Supplement: Supplementary file 1 [file 4212739]

# **Supporting Information**

## **Electroluminescent Networks via Photo “Click” Chemistry**

*Andrew R. Davis, Janet A. Maegerlein, Kenneth R. Carter*

Department of Polymer Science and Engineering

University of Massachusetts Amherst

Conte Center for Polymer Research

120 Governors Drive, Amherst, Massachusetts 01003

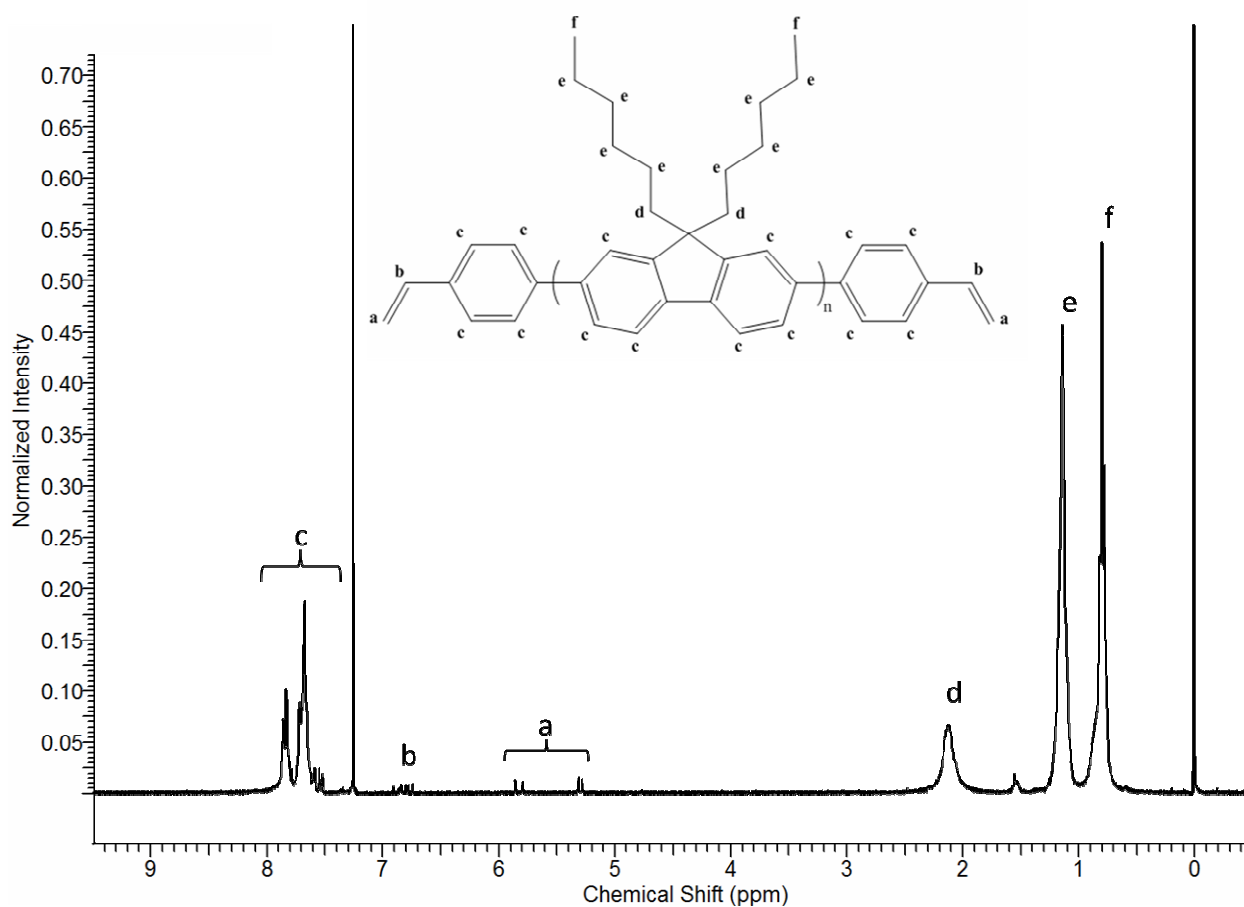

**Figure S1.**  $^1\text{H}$  NMR spectrum for synthesized 4-phenylethenyl end-capped poly(styrene).

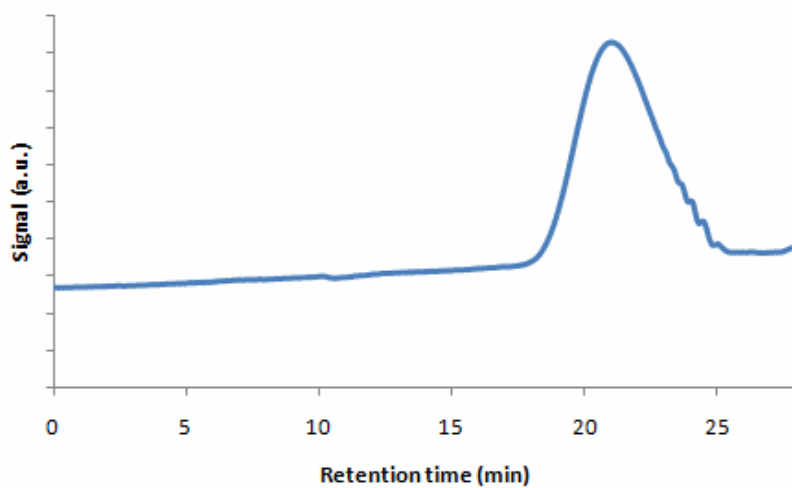

**Figure S2.** Gel permeation chromatography (GPC) trace of xDHF in THF compared to poly(styrene) standards.

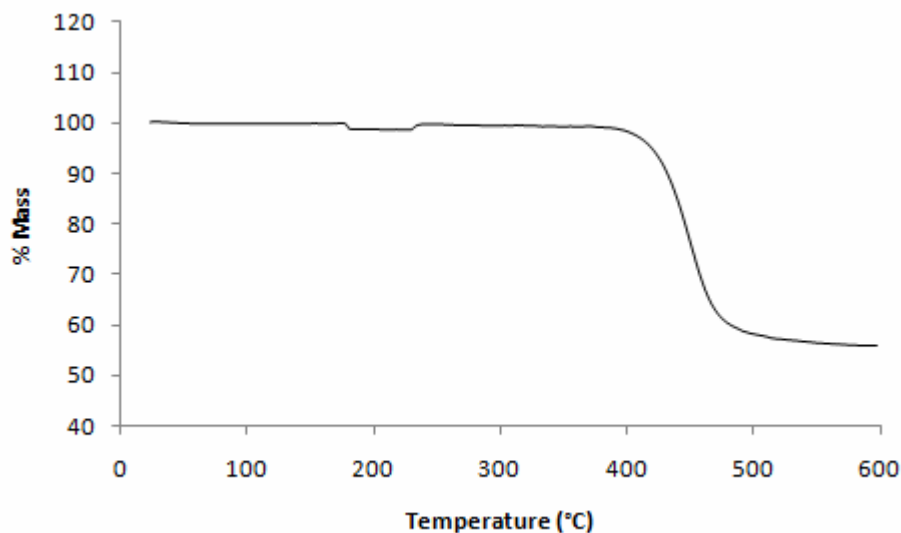

**Figure 3.** Thermogravimetric analysis (TGA) of xDHF. The polymer was found to be thermally stable (5% weight loss) up to 419 °C.

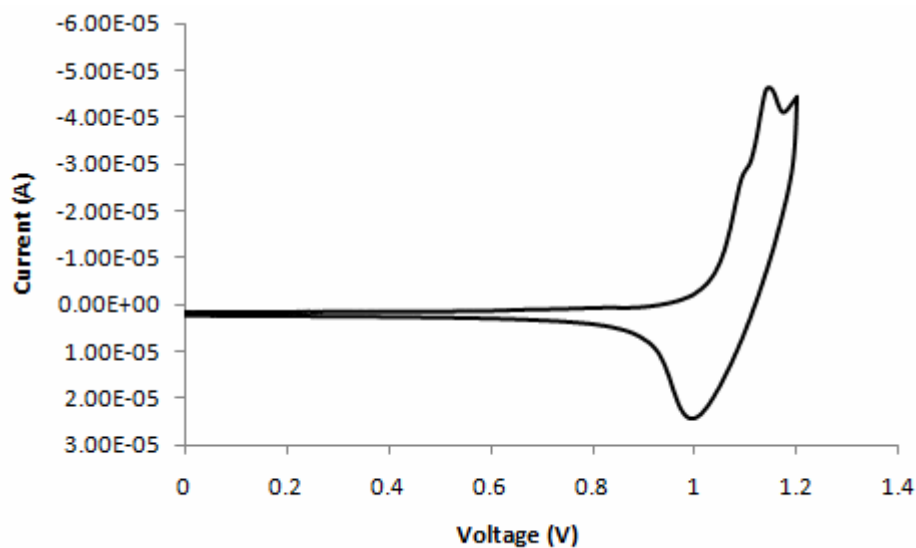

| $E_{\text{onset}}$ (V) | $\lambda_{\text{onset}}$ (nm) | Optical Band Gap (eV) | HOMO/LUMO (-eV) |
|------------------------|-------------------------------|-----------------------|-----------------|
| 0.987                  | 418                           | 2.97                  | 5.39 / 2.42     |

**Figure 4.** Cyclic voltammetry (CV) and electrochemical properties of xDHF polymer in an electrolyte solution of 0.1 M  $\text{Bu}_4\text{NPF}_6$  in acetonitrile using platinum wires (Bioanalytical System Inc.) as both counter and working electrodes and a silver/silver ion reference electrode (Ag in 0.1 M  $\text{AgNO}_3$  solution).  $\lambda_{\text{onset}}$  and optical band gap were determined from UV-vis absorption (see text) and subsequently used to estimate LUMO level of xDHF from the HOMO level known via CV.
